# Supplementary material for: Rape Straw Biochar Application Enhances Cadmium Immobilization by Promoting Formation of Sulfide and Poorly Crystallized Fe Oxide in Paddy Soils
Source: MDPI journal article supplement (doi:10.3390/agronomy13112693), 2023-10-26
Supplement: s1 [file s1]

Archive with 1 entries (1 files):
- agronomy-2637796-supplementary.pdf
