# Supplementary material for: Rape Straw Biochar Application Enhances Cadmium Immobilization by Promoting Formation of Sulfide and Poorly Crystallized Fe Oxide in Paddy Soils
Source: MDPI journal article supplement (doi:10.3390/agronomy13112693), 2023-10-26
Supplement: s1 [file s1 › agronomy-2637796-supplementary.pdf]

## 23 Figures

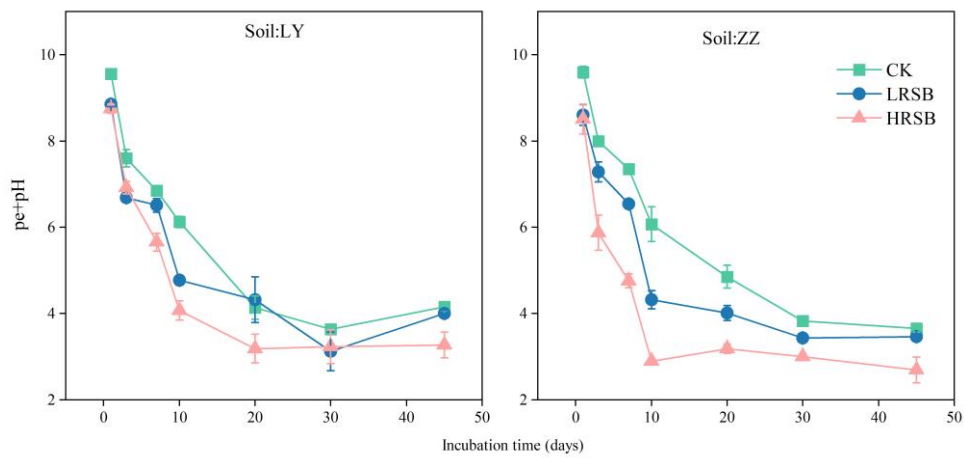

24

25 Fig. S1 Dynamics of pe+pH under anoxic conditions for batch experiments. The data

26 are expressed as the mean  $\pm$ SD, n=3.

27

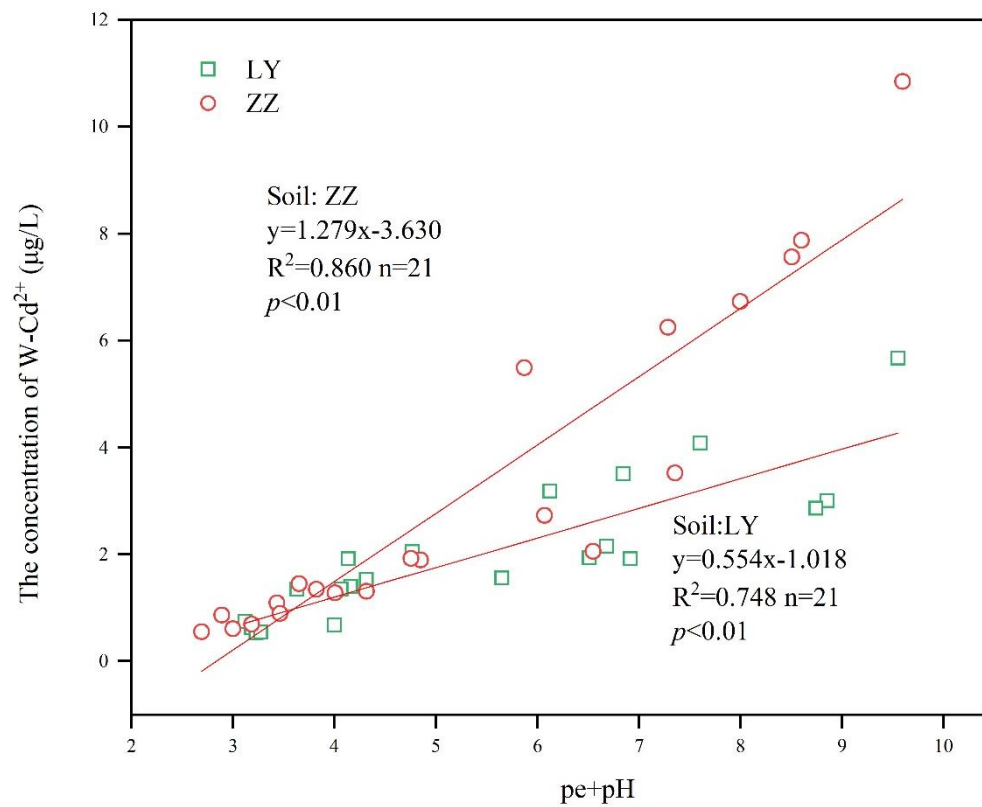

28

29 Fig. S2. The correlation analysis of pe+pH and W-Cd<sup>2+</sup> concentration in LY and ZZ

30 soils. The data are expressed as the mean  $\pm$  SD,  $n = 3$ .

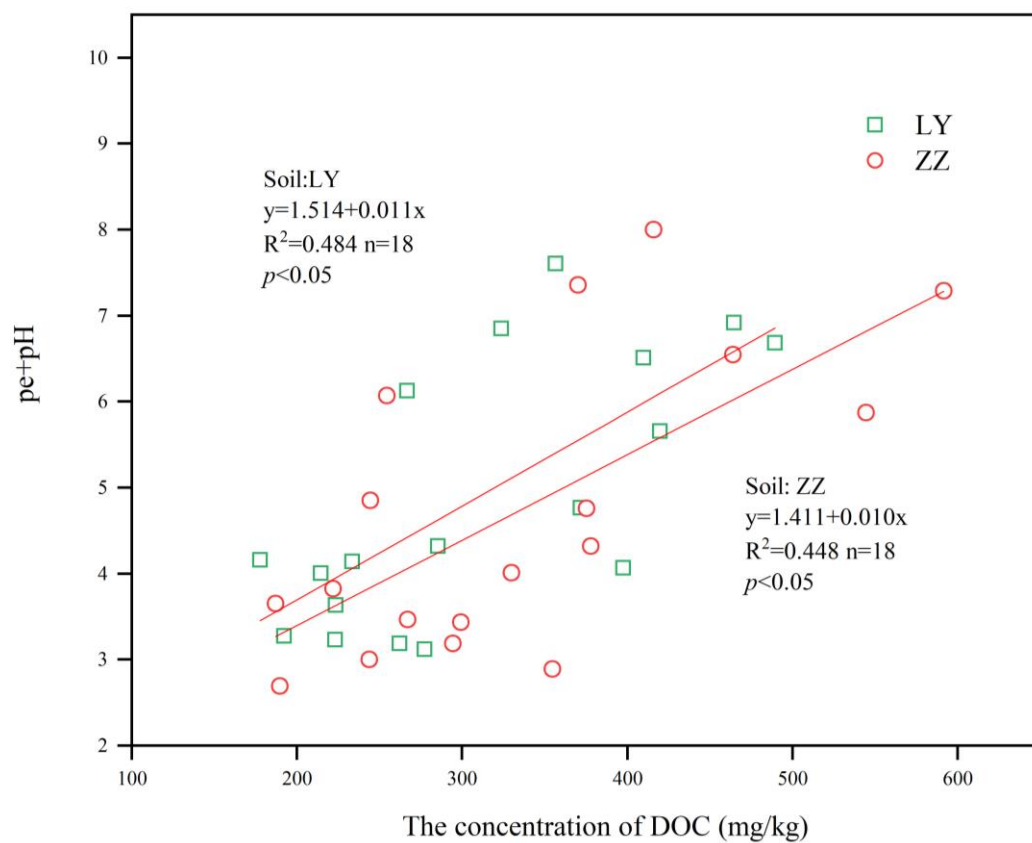

31

32 Fig. S3 The correlation analysis of DOC and pe+pH in LY and ZZ soils. The data are

33 expressed as the mean  $\pm$  SD,  $n = 3$ .

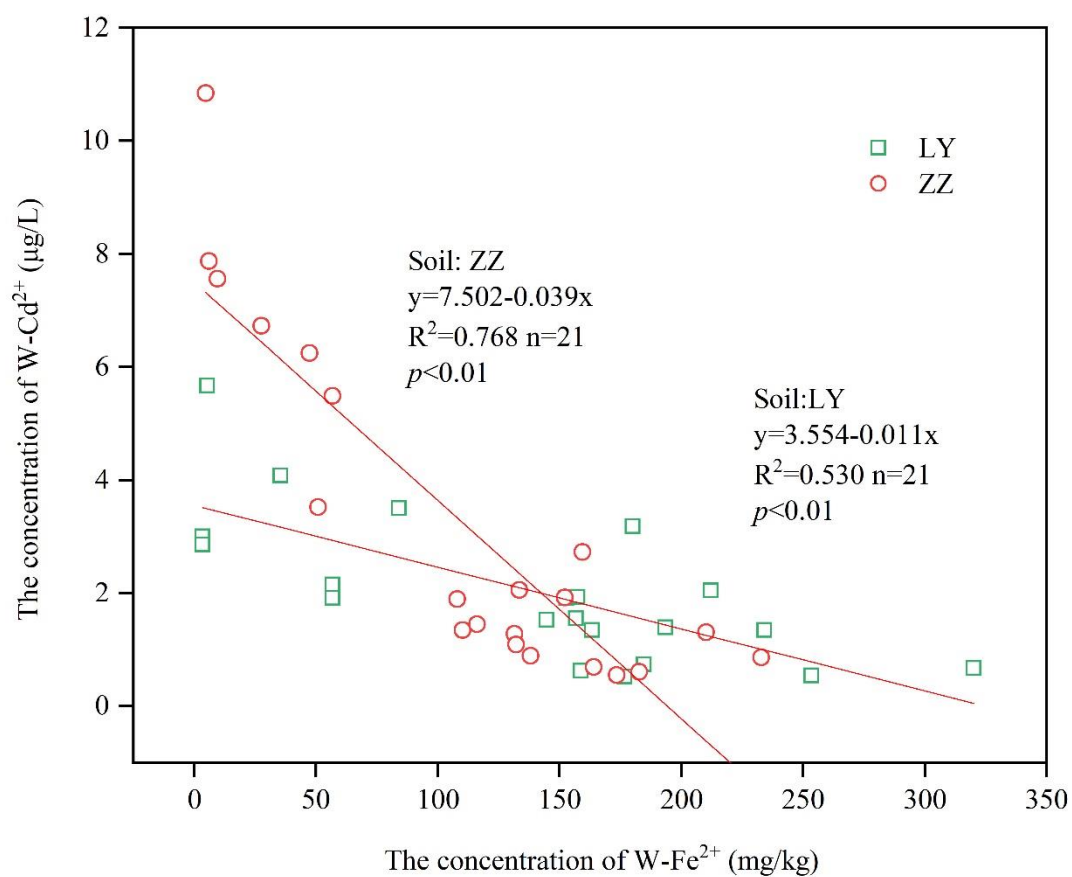

34

35 Fig. S4 The correlation analysis of W-Fe<sup>2+</sup> and W-Cd<sup>2+</sup> concentration in LY and ZZ

36 soils. The data are expressed as the mean  $\pm$  SD,  $n = 3$ .

37

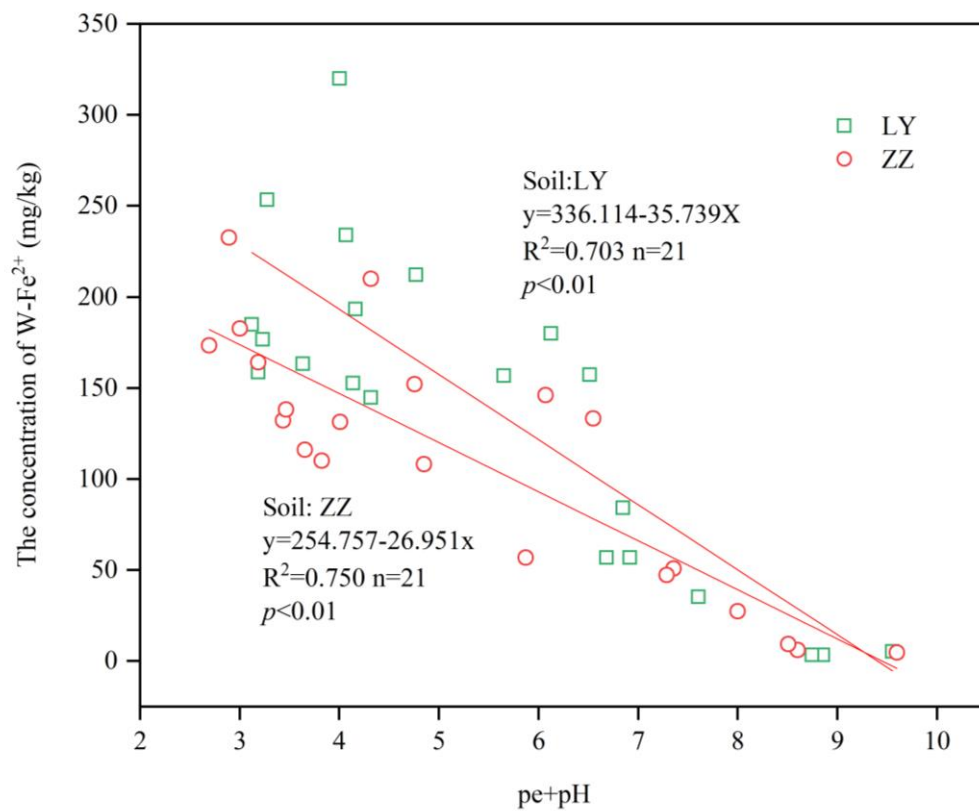

38

39 Fig. S5 The correlation analysis of pe+pH and W-Fe<sup>2+</sup> concentration in LY and ZZ soils.

40 The data are expressed as the mean  $\pm$  SD, n = 3.

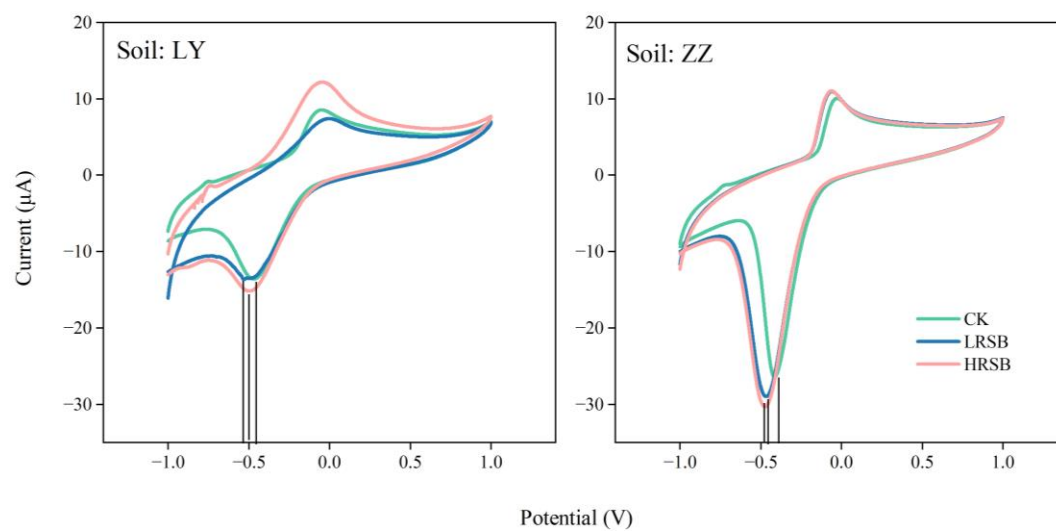

41

42 Fig. S6 The CVs in LY and ZZ soils at scan rates of  $0.05 \text{ V s}^{-1}$ .

43

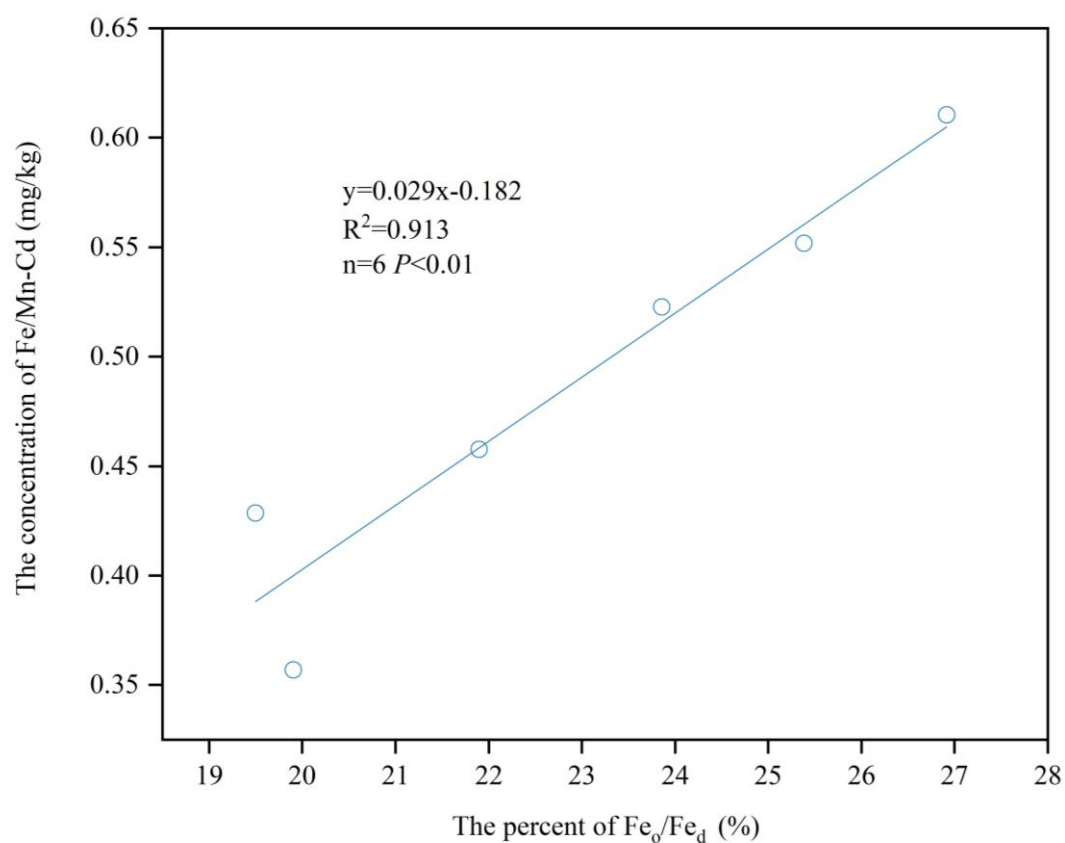

44

45 Fig. S7 The correlation analysis of percent of Fe<sub>o</sub>/Fe<sub>d</sub> and Fe/Mn-Cd under anoxic

46 conditions for batch experiments. The data are expressed as the mean  $\pm$  SD,  $n = 3$ .

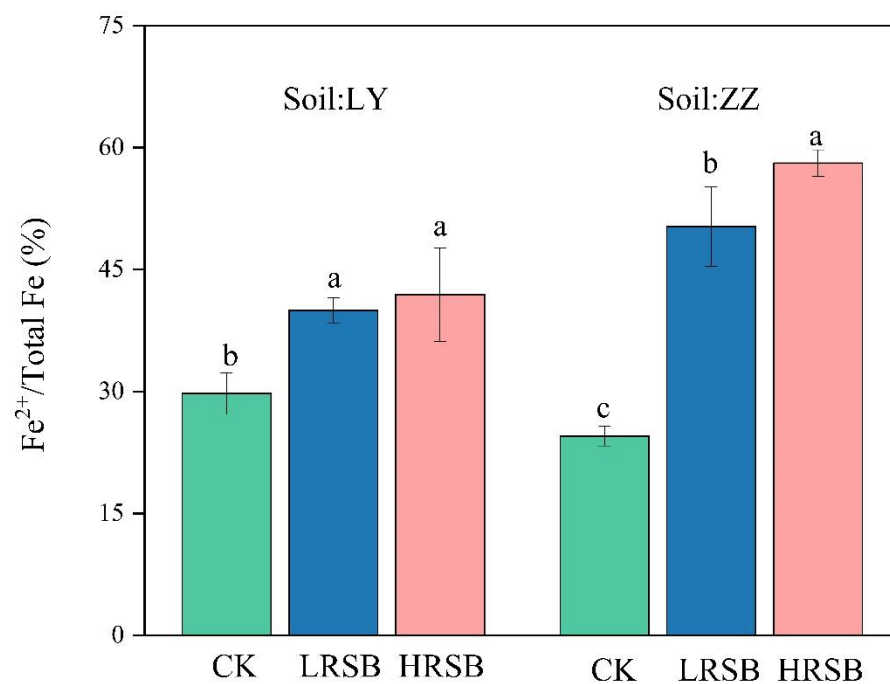

47

48 Fig. S8. The percent of Fe<sup>2+</sup>/Total Fe under anoxic conditions for batch experiments.

49 The data are expressed as the mean  $\pm$ SD, n=3.

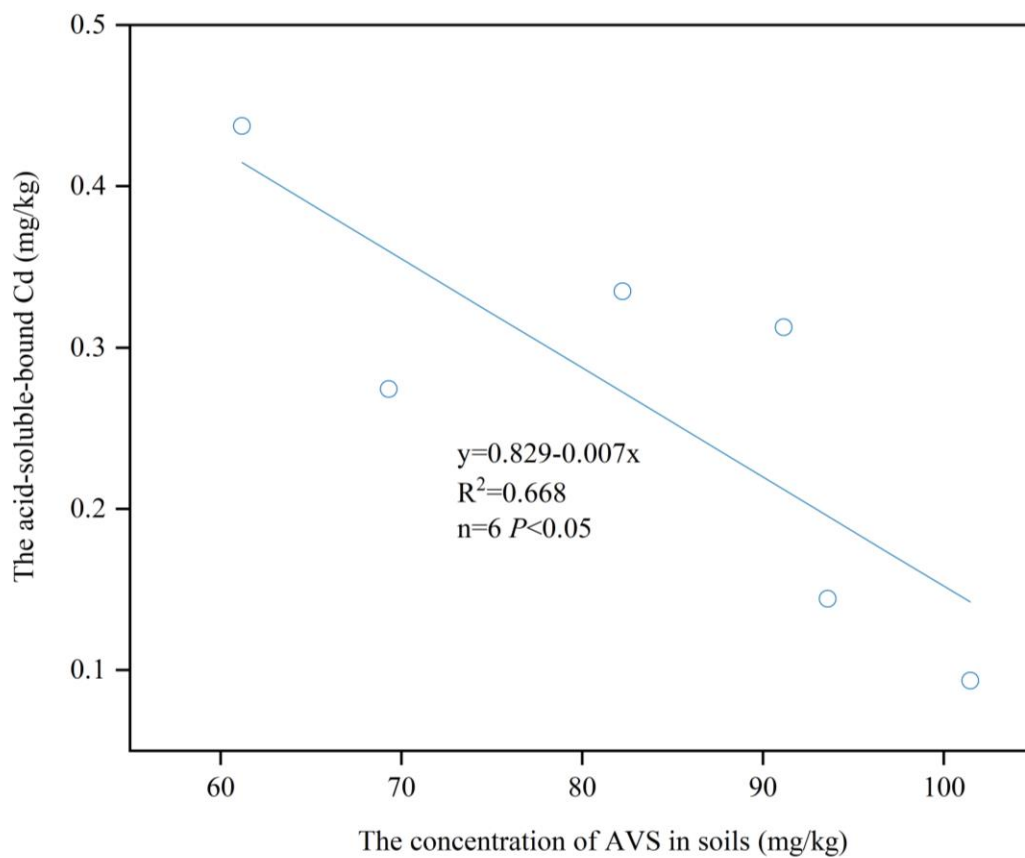

50

51 Fig. S9 The correlation analysis of AVS and  $\text{CaCl}_2$ -Cd in soil. The data are expressed

52 as the mean  $\pm$ SD,  $n = 3$ .

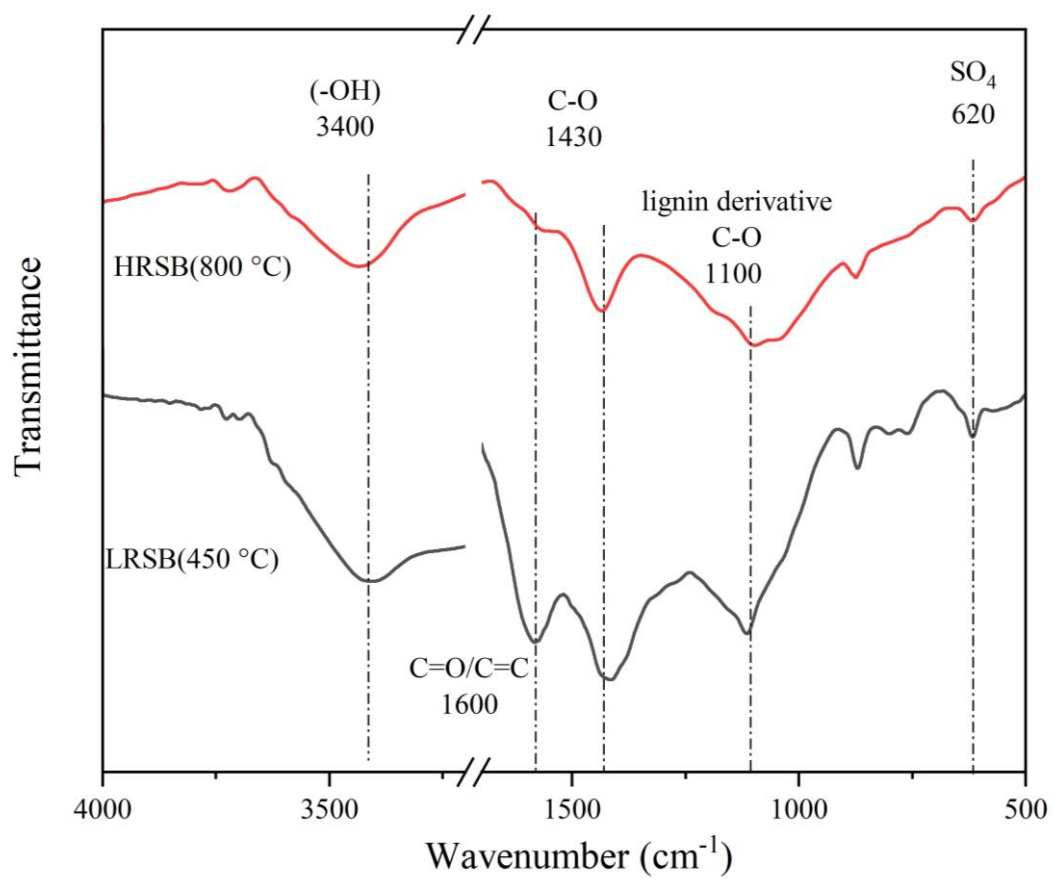

53

54 Fig. S10 The FTIR of rape straw biochar.
